# Supplementary material for: Synthesis of porous high-temperature superconductors via a melamine formaldehyde sacrificial template
Source: Royal Society of Chemistry journal article supplement (doi:10.1039/d2na00333c), 2022-01-01
Supplement: d2na00333c1.pdf [file d2na00333c1.pdf]

## Supplementary information for

# Synthesis of porous high-temperature superconductors *via* a melamine formaldehyde sacrificial template

Emily J. Luke<sup>1</sup>, Jason Potticary<sup>1</sup>, Lui R. Terry<sup>2</sup>, Huan V. Doan<sup>1</sup>, Roemer Hinoplen<sup>3</sup>, Sam Cross<sup>3</sup>, Valeska P. Ting<sup>2</sup>, Sven Friedemann<sup>3</sup>, Simon R. Hall<sup>1\*</sup>

Affiliations:

<sup>1</sup> School of Chemistry, University of Bristol, Cantock's Close, Bristol, BS8 1TS

<sup>2</sup> Bristol Composites Institute, Department of Mechanical Engineering, University of Bristol, Queen's Building, Bristol, BS8 1TR

<sup>3</sup> School of Physics, HH Wills Physics Laboratory, Tyndall Avenue, Bristol, BS8 1TL

\*email: [simon.hall@bristol.ac.uk](mailto:simon.hall@bristol.ac.uk)

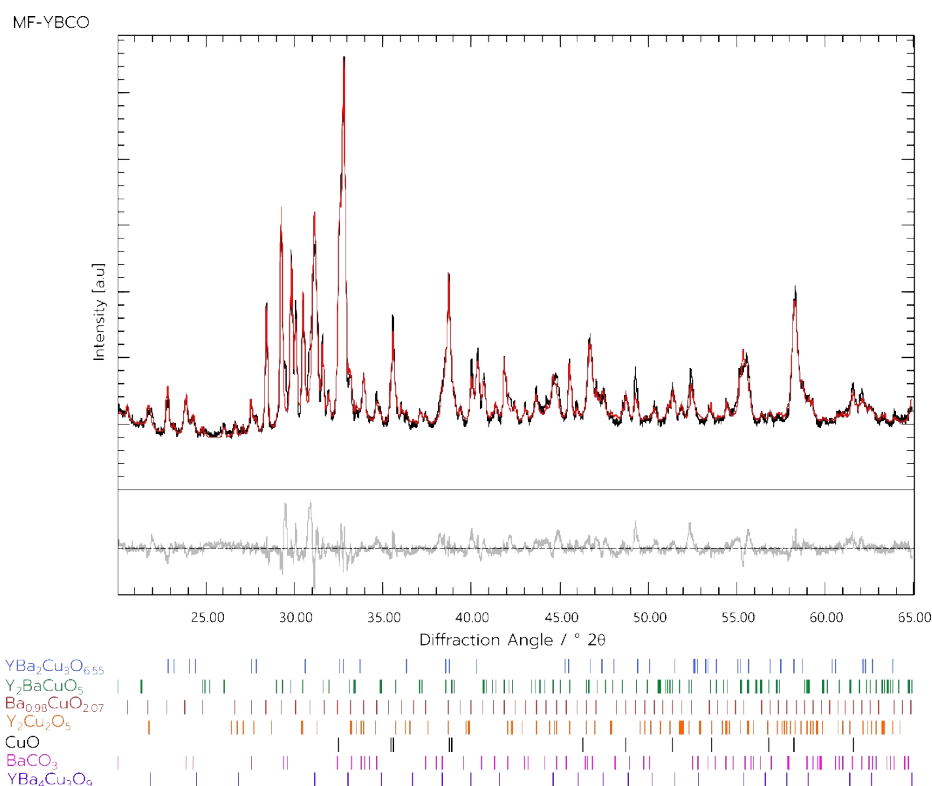

**Figure S1** – YBCO MF sponge only (MF-YBCO), refined PXRD pattern with  $R_{wp} = 6.93\%$ . Observed data points and calculated pattern are shown as black and red, respectively.

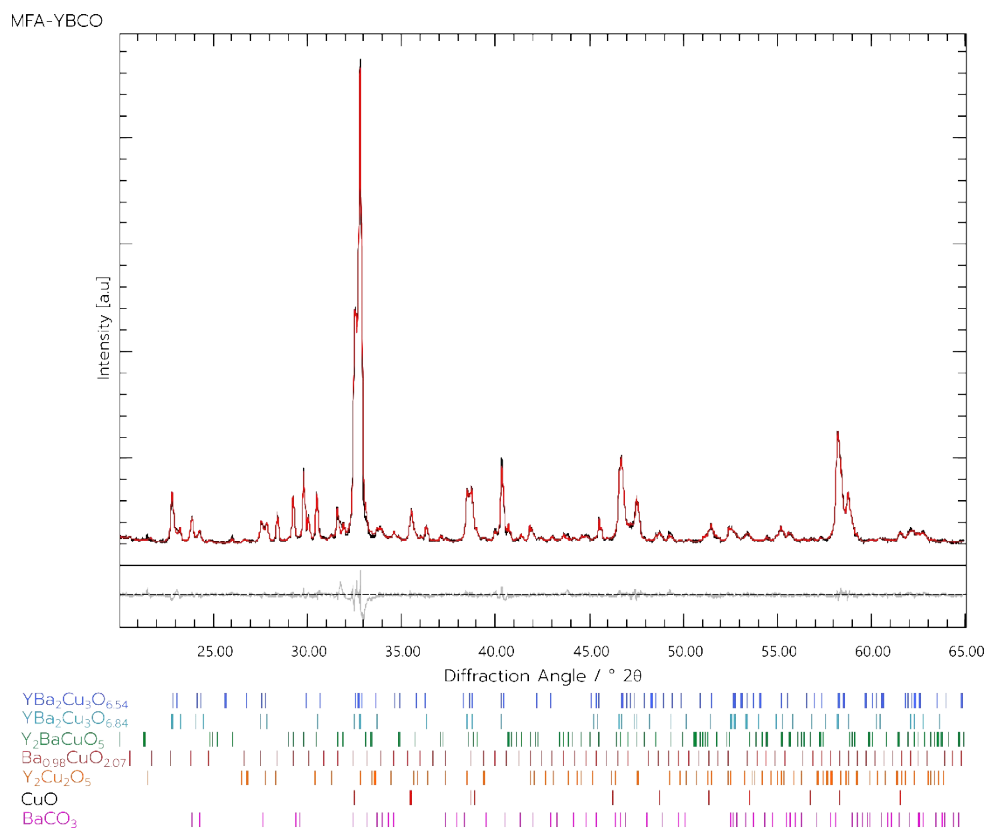

**Figure S2** – YBCO sodium alginate only (MFA-YBCO), refined PXRD pattern with  $R_{\text{wp}} = 4.01\%$ . Observed and calculated plots are shown as black and red, respectively.

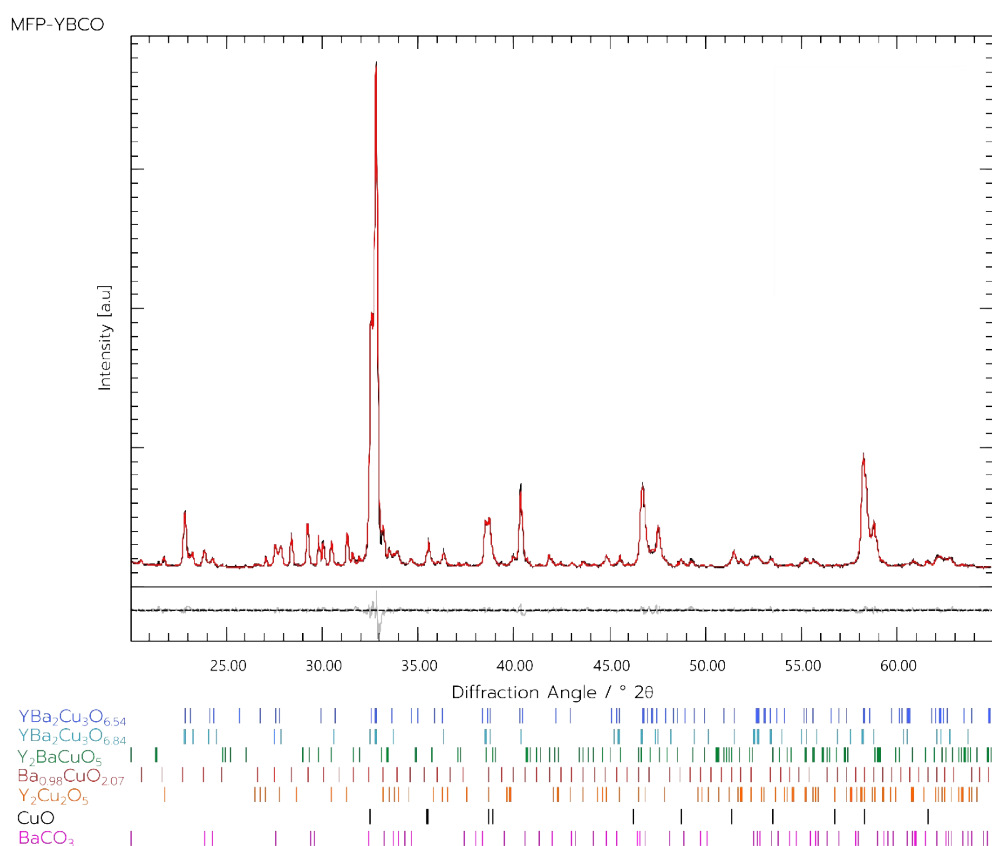

**Figure S3** – YBCO Pechini synthesis with the MF sponge (MFP-YBCO) refined PXRD pattern with  $R_{\text{wp}} = 3.37\%$ . Observed and calculated plots are shown as black and red, respectively.

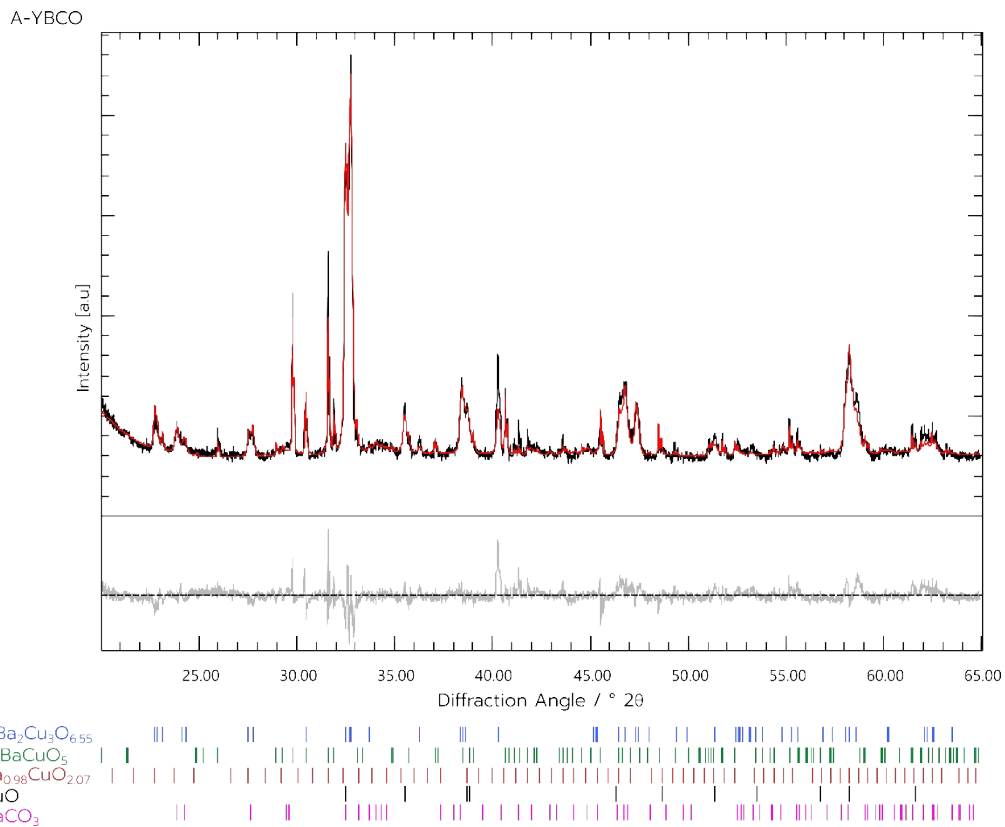

**Figure S4** - YBCO Alginate-only control synthesis  $R_{wp} = 7.21\%$ . Observed and calculated plots are shown as black and red, respectively.

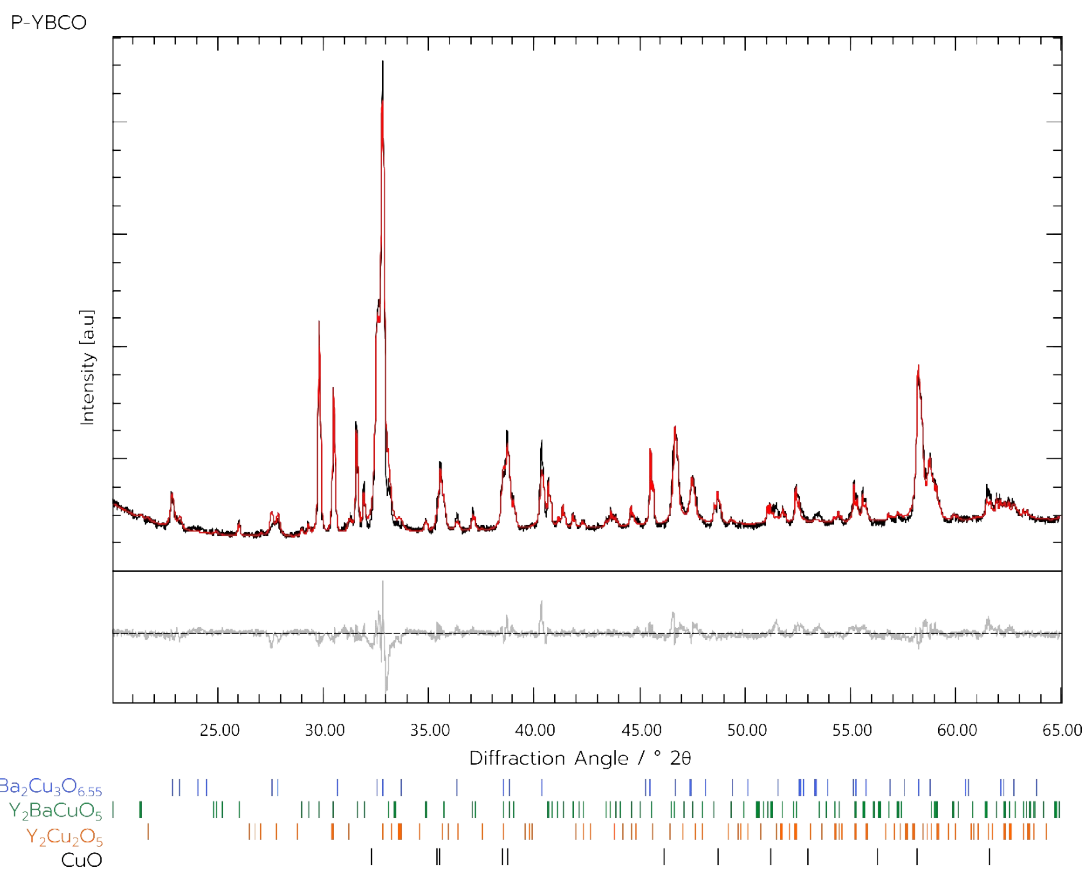

**Figure S5** – YBCO Pechini method control synthesis  $R_{wp} = 6.45\%$ . Observed and calculated plots are shown as black and red, respectively.

| Phase                                             | MF Only<br>Quantity / % | Alginate<br>method<br>Quantity / % | Pechini<br>method<br>Quantity / % | Alginate only<br>control<br>Quantity / % | Pechini only<br>control<br>Quantity / % | ICSD reference code       |
|---------------------------------------------------|-------------------------|------------------------------------|-----------------------------------|------------------------------------------|-----------------------------------------|---------------------------|
| YBa <sub>2</sub> Cu <sub>3</sub> O <sub>6+δ</sub> | 36                      | 65                                 | 69                                | 59                                       | 50                                      | 79050 / 173898 /<br>83061 |
| Y <sub>2</sub> BaCuO <sub>5</sub>                 | 17                      | 13                                 | 4                                 | 18                                       | 22                                      | 10883                     |
| Ba <sub>0.98</sub> CuO <sub>2.07</sub>            | 18                      | 8                                  | 9                                 | 0                                        | 0                                       | 202998                    |
| Y <sub>2</sub> Cu <sub>2</sub> O <sub>5</sub>     | 4                       | 1                                  | 8                                 | 0                                        | 4                                       | 72058                     |
| CuO                                               | 12                      | 9                                  | 7                                 | 16                                       | 23                                      | 87126                     |
| BaCO <sub>3</sub>                                 | 4                       | 4                                  | 3                                 | 6                                        | 0                                       | 15196                     |
| YBa <sub>4</sub> Cu <sub>3</sub> O <sub>9</sub>   | 9                       | 0                                  | 0                                 | 0                                        | 0                                       | 65867                     |

**Table S1** - Table of YBCO phases as determined by multi-phase Rietveld refinement

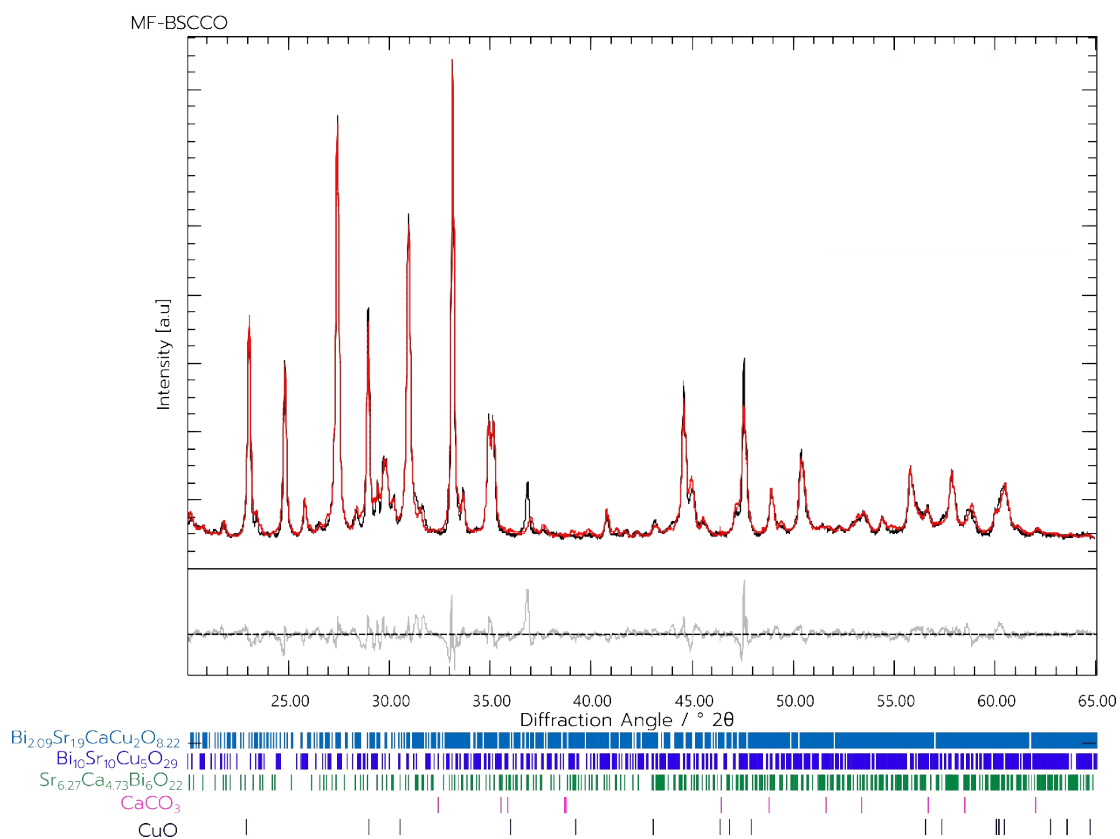

**Figure S6** - BSCCO MF sponge only (MF-BSCCO) refined PXRd pattern  $R_{wp} = 8.93\%$ . Observed and calculated plots are shown as black and red, respectively.

MFA-BSCCO

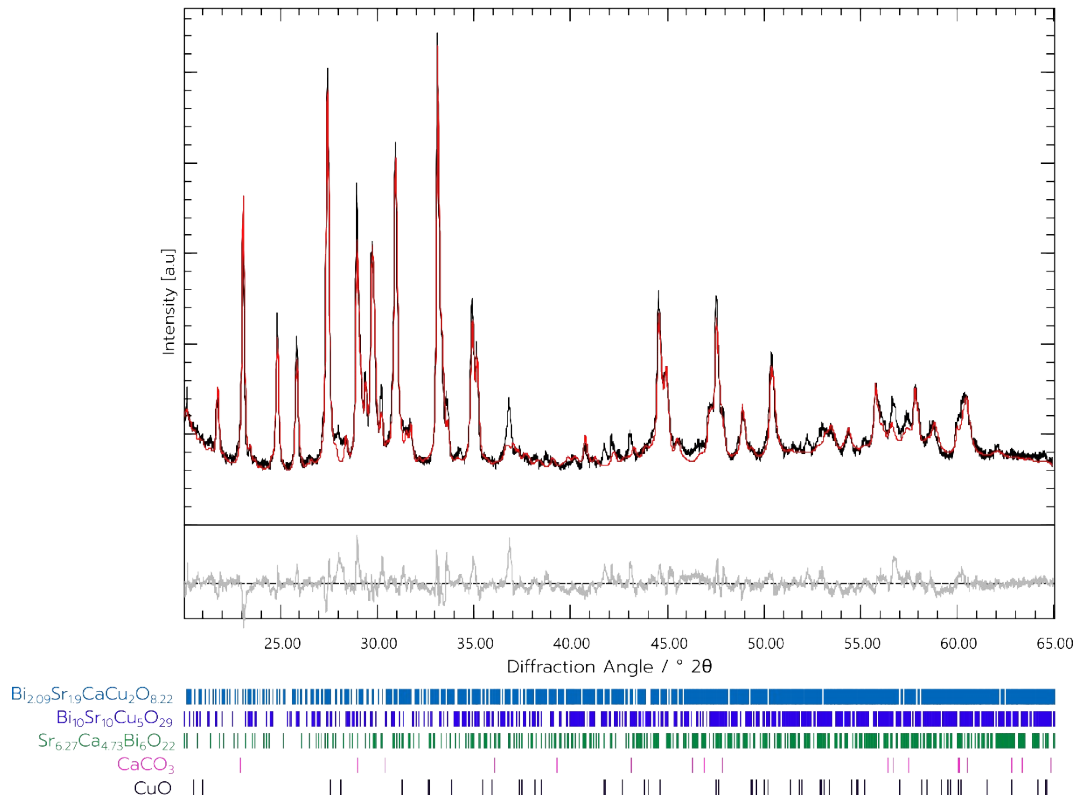

**Figure S7** - BSCCO alginate and MF sponge method (MFA-BSCCO) refined PXRDR pattern,  $R_{\text{wp}} = 7.72\%$ . Observed and calculated plots are shown as black and red, respectively.

MFP-BSCCO

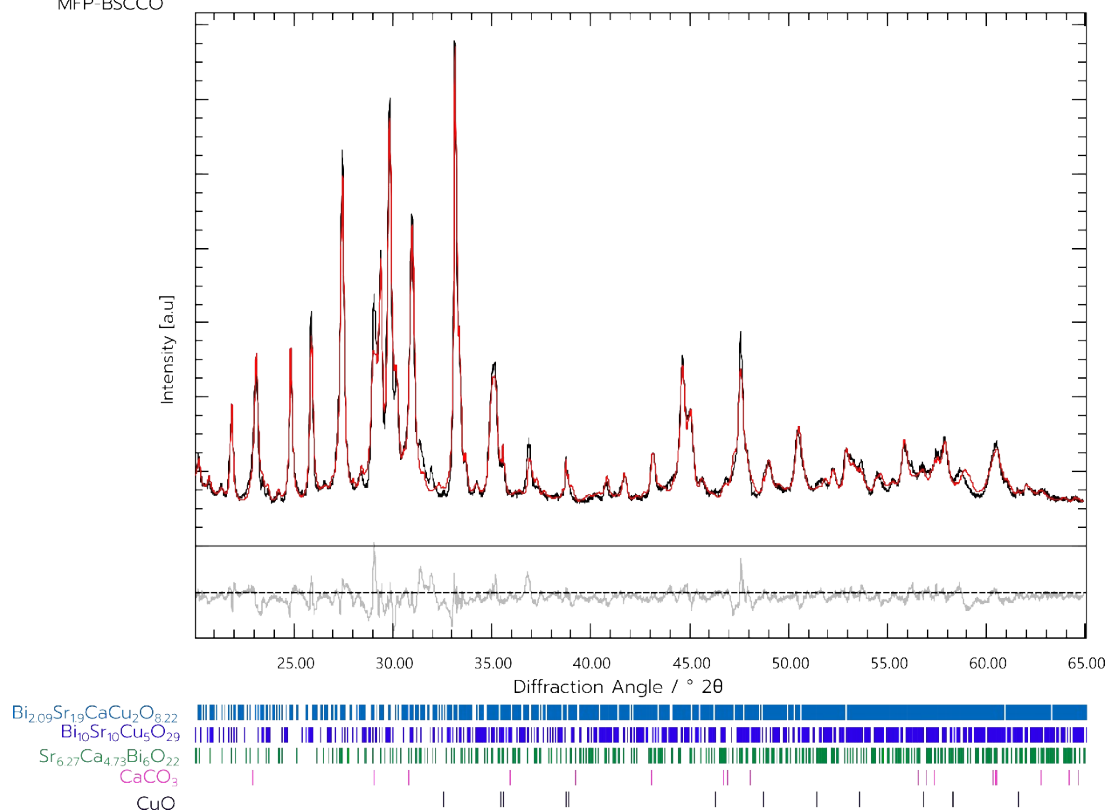

**Figure S8** - BSCCO Pechini synthesis with the MF sponge (MFP-BSCCO) refined PXRDR pattern,  $R_{\text{wp}} = 7.57\%$ . Observed and calculated plots are shown as black and red, respectively.

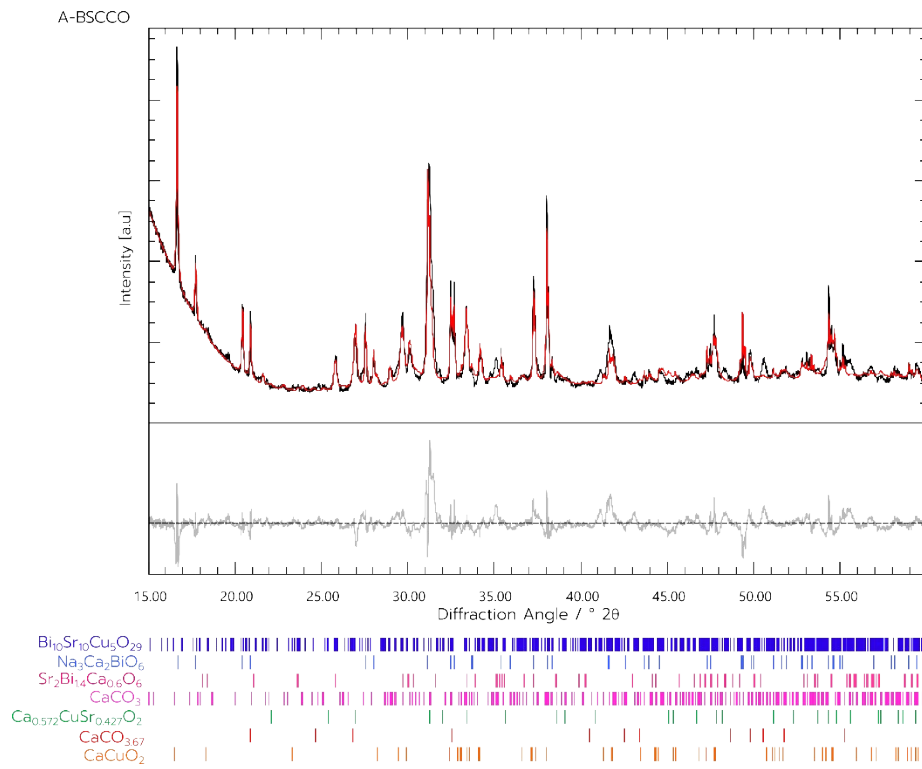

**Figure S9** – BSCCO alginate only control synthesis  $R_{wp} = 10.63\%$ . Observed and calculated plots are shown as black and red, respectively.

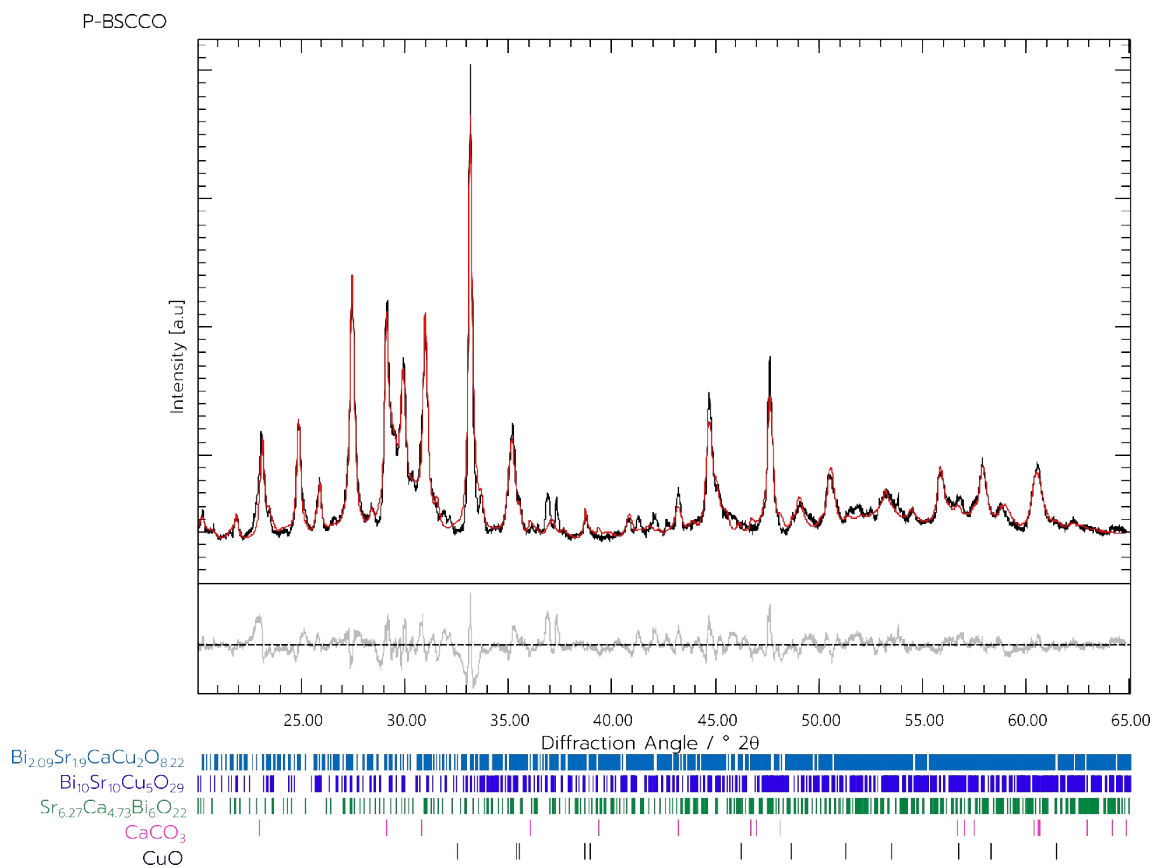

**Figure S10** – BSCCO Pechini only control experiment  $R_{wp} = 9.46\%$ . Observed and calculated plots are shown as black and red, respectively

| Phase                                                         | MF Only      | Alginate     | Pechini      | Alginate only | Pechini method only | ICSD reference code |
|---------------------------------------------------------------|--------------|--------------|--------------|---------------|---------------------|---------------------|
|                                                               | Quantity / % | method       | method       | control       | control             |                     |
|                                                               |              | Quantity / % | Quantity / % | Quantity / %  | Quantity / %        |                     |
| $\text{Bi}_{2.09}\text{Sr}_{0.9}\text{CaCu}_2\text{O}_{8.22}$ | 86           | 65           | 56           | -             | 63                  | 203210              |
| $\text{Bi}_{10}\text{Sr}_{10}\text{Cu}_5\text{O}_{29}$        | 6            | 17           | 17           | 5             | 6                   | 65557               |
| $\text{Sr}_{6.27}\text{Ca}_{4.73}\text{Bi}_6\text{O}_{22}$    | 6            | 5            | 14           | -             | 15                  | 56774               |
| $\text{CaCO}_3$                                               | 2            | 14           | 11           | 44            | 12                  | 191880              |
| $\text{CuO}$                                                  | 0            | 0            | 3            | -             | 3                   | 16025               |
| $\text{Na}_3\text{Ca}_2\text{BiO}_6$                          | -            | -            | -            | 23            | -                   | 240975              |
| $\text{Ca}_{0.573}\text{CuO}_2\text{Sr}_{0.427}$              | -            | -            | -            | 6             | -                   | 77286               |
| $\text{CaCuO}_2$                                              | -            | -            | -            | 17            | -                   | 84868               |
| $\text{Ca}(\text{CO}_3)_{0.67}$                               | -            | -            | -            | 6             | -                   | 130016              |

**Table S2** - Table of BSCCO phases as determined by multi-phase Rietveld refinement

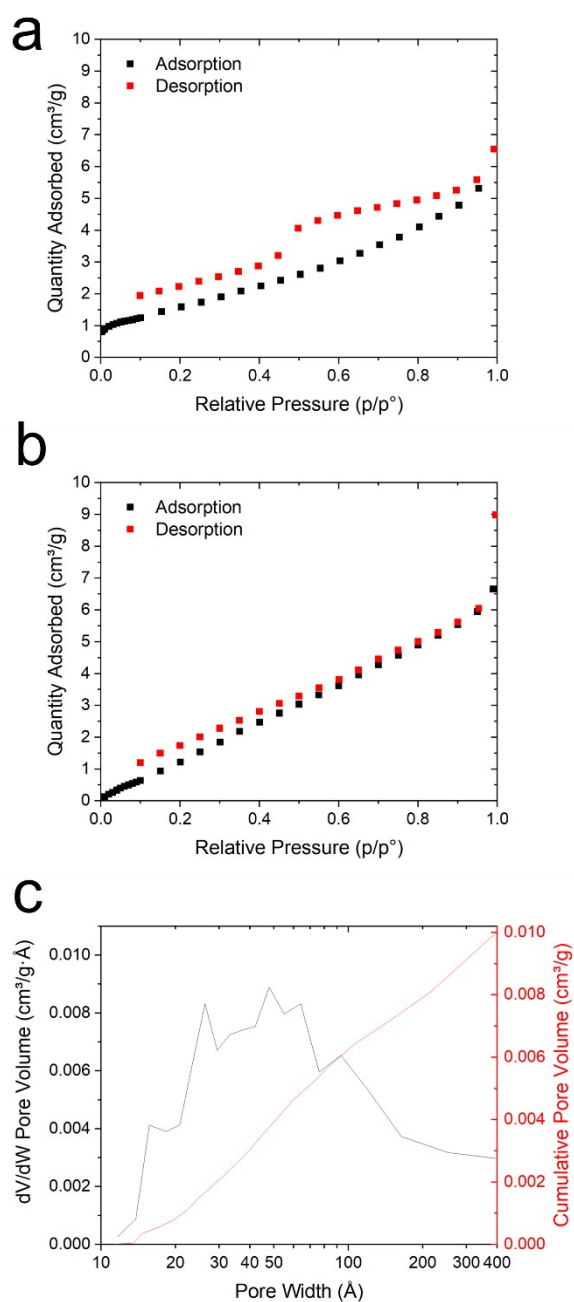

**Figure S11:** - N<sub>2</sub> gas sorption isotherms of a) MFP-YBCO sponges and b) MFP-BSCCO sponges. c) BJH pore size distribution for YBCO

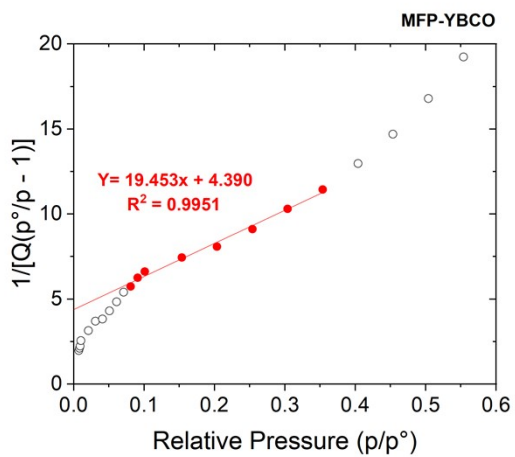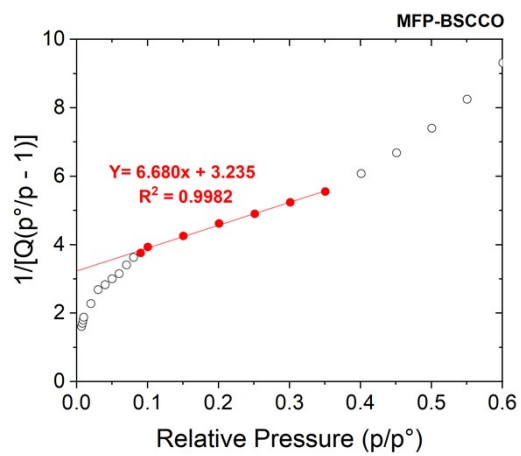

**Figure S12:** BET Plots for typical MFP-YBCO (A) and MFP-BSCCO (B) samples.
